# Supplementary material
Source: PubMed Central journal article supplement (PMC4460510)
Supplement: pnas.201507393SI.pdf [file pnas.201507393SI.pdf]

# Supporting Information

Kim et al. 10.1073/pnas.1507393112

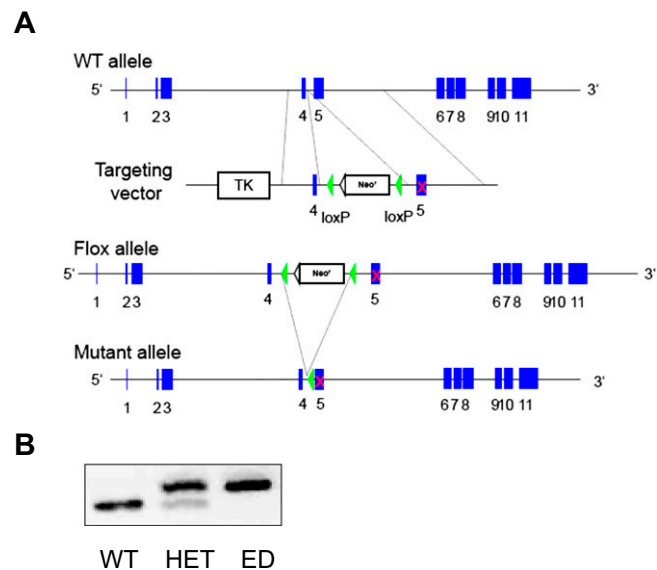

**Fig. S1.** (A) Targeting strategy of *AMCase-ED* mice. (B) Genotyping PCR. WT allele gives a 120-bp fragment, whereas *AMCase-ED* allele gives a 150-bp fragment. The primer sequences are listed in *Materials and Methods*.







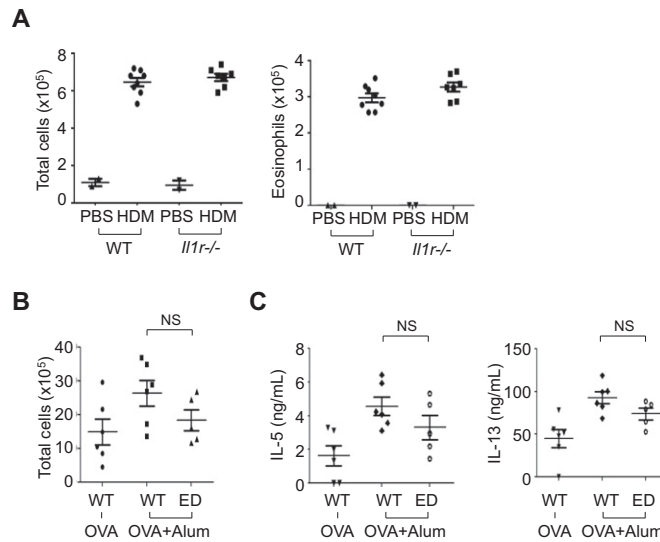

**Fig. S6.** WT and *Il1r*<sup>-/-</sup> mice after administration of HDM. (A) The number of total cells (Left) or eosinophils (Right) in the BAL of WT or *Il1r*<sup>-/-</sup> mice after administration of PBS or HDM. (B) The number of total cells in the BAL of WT or *AMCase-ED* mice after administration of OVA. (C) Production of IL-5 (Left) and IL-13 (Right). Unpaired Student's *t* test was performed. Error bars indicate the SEM.

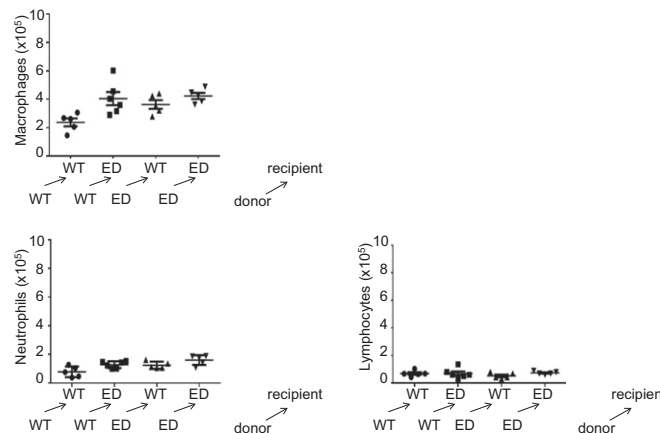

**Fig. S7.** The number of macrophages, neutrophils, or lymphocytes in the BAL of WT  $\rightarrow$  WT (where WT bone marrow was injected into irradiated WT recipients), WT  $\rightarrow$  *AMCase-ED*, *AMCase-ED*  $\rightarrow$  WT, or *AMCase-ED*  $\rightarrow$  *AMCase-ED* mice after administration of HDM. Error bars indicate the SEM.

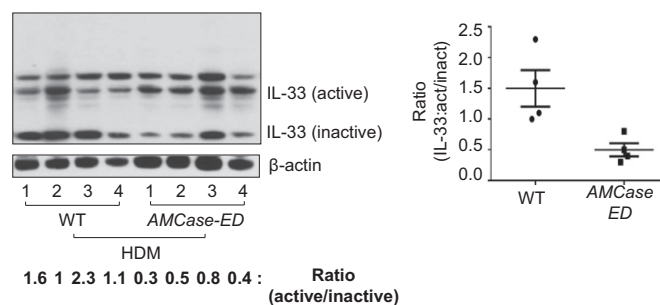

**Fig. S8.** IL-33 processing in the lung in WT or *AMCase-ED* mice after administration of HDM. Immunoblot analysis of IL-33 and  $\beta$ -actin in lung lysates from WT mice or *AMCase-ED* mice after administration of HDM. The number (immediately below the immunoblot analysis) indicates the individual mouse. The bolder numbers are the ratios, calculated by active IL-33 density divided by inactive IL-33 density. The density is measured using ImageJ (NIH). The ratio from each individual mouse was plotted (Right). Error bars indicate the SEM.

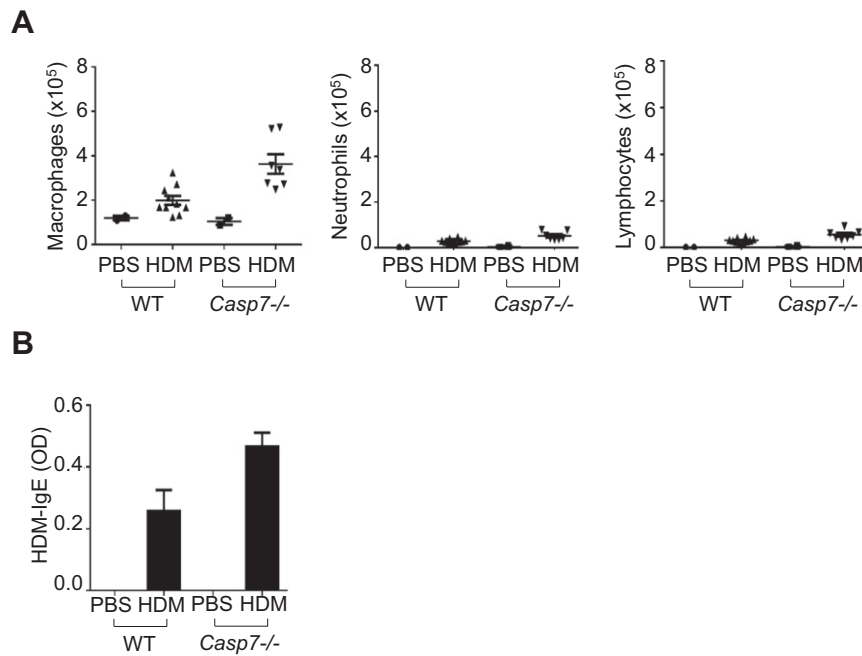

**Fig. 59.** WT and *Casp7*<sup>-/-</sup> mice after administration of HDM. (A) The number of macrophages (Left), neutrophils (Middle) or lymphocytes (Right) in the BAL of WT or *Casp7*<sup>-/-</sup> mice after administration of PBS or HDM. (B) Levels of HDM-specific IgE in serum of WT or *Casp7*<sup>-/-</sup> mice after administration of PBS or HDM. Data were combined from at least three independent experiments. Error bars indicate the SEM.

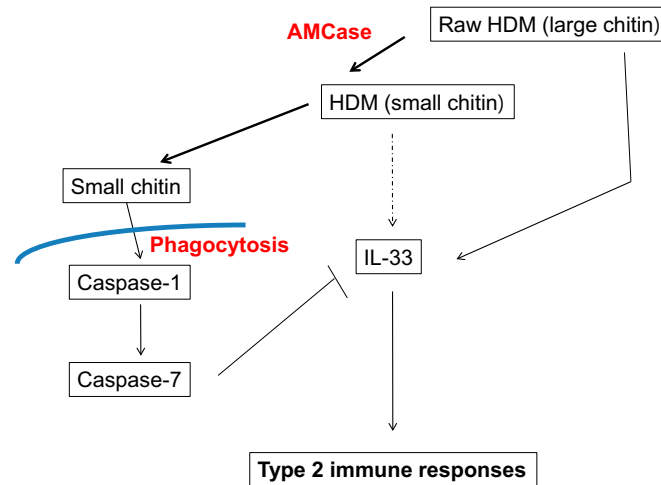

**Fig. 510.** Proposed model.
